# Supplementary material for: Efficient evolution of human antibodies from general protein language models
Source: Springer Nature journal article supplement (doi:10.1038/s41587-023-01763-2), 2023-04-24
Supplement: 41587_2023_1763_MOESM1_ESM.pdf [file 41587_2023_1763_MOESM1_ESM.pdf]

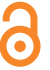

---

# Efficient evolution of human antibodies from general protein language models

---

In the format provided by the authors and unedited

**Supplementary Tables 1-13**

| Antibody          | Matured?                 | Source                               | Virus        | Screened antigen | Round-1 variants with improved binding | Round-1 variants with preserved binding | Best affinity improvement (antigen) | Best neutralization improvement (virus) |
|-------------------|--------------------------|--------------------------------------|--------------|------------------|----------------------------------------|-----------------------------------------|-------------------------------------|-----------------------------------------|
| MEDI8852 [29]     | Yes (in vivo + in vitro) | Patient-derived + in vitro evolution | Influenza A  | HA H4 Hubei      | 2 / 14 = 14%                           | 13 / 14 = 93%                           | 7-fold (HA H7 HK17)                 | ND                                      |
| MEDI8852 UCA [29] | No                       | Germline-inferred                    | Influenza A  | HA H1 Solomon    | 3 / 8 = 38%                            | 8 / 8 = 100%                            | 23-fold (HA H4 Hubei)               | ND                                      |
| mAb114 [30]       | Yes                      | Patient-derived                      | Ebolavirus   | GP               | 7 / 13 = 54%                           | 13 / 13 = 100%                          | 3.4-fold (GP)                       | 1.5-fold (GP pseudotyped lentivirus)    |
| mAb114 UCA [30]   | No                       | Germline-inferred                    | Ebolavirus   | GP               | 6 / 9 = 67%                            | 7 / 9 = 78%                             | 160-fold (GP)                       | >100-fold (GP pseudotyped lentivirus)   |
| S309 [31]         | Yes                      | Patient-derived                      | Sarbecovirus | Wuhan-Hu-1 S-6P  | 2 / 10 = 20%                           | 9 / 10 = 90%                            | 1.7-fold (Beta S-6P)                | ND                                      |
| REGN10987 [32]    | Yes                      | Patient-derived                      | SARS-CoV-2   | Beta S-6P        | 2 / 8 = 25%                            | 8 / 8 = 100%                            | 1.3-fold (Beta S-6P)                | 2-fold (Beta pseudotyped lentivirus)    |
| C143 [39]         | No                       | Patient-derived                      | SARS-CoV-2   | Beta S-6P        | 10 / 14 = 71%                          | 10 / 14 = 71%                           | 13-fold (Beta S-6P)                 | 31-fold (Beta pseudotyped lentivirus)   |

**Supplementary Table 1: Summary of antibodies considered in this study.**

Information on the antibodies considered in each of our directed evolution campaigns. Matured indicates extensive somatic hypermutation from germline (and, in the case of MEDI8852, additional in-vitro affinity maturation). Source indicates how the antibody sequence was obtained; germline-inferred sequences were obtained from the original publications. Improved binding is

defined as a 1.1-fold improvement or higher from wildtype. Preserved binding is defined as a sub-micromolar  $K_d$  for the screened antigen. ND: not determined.

| Round            | Design            | Region | H4 Hubei<br>Fab $K_d$ (nM) | H7 HK16<br>Fab $K_d$ (nM) | H7 HK17<br>Fab $K_d$ (nM) |
|------------------|-------------------|--------|----------------------------|---------------------------|---------------------------|
|                  | MEDI8825<br>WT    |        | 0.60                       | 6.2                       | 0.21                      |
| Round 1          | VH D27F           | HFR1   | 1.1                        | 7.8                       | ND                        |
|                  | VH V35Y           | CDR-H1 | 0.83                       | 9.2                       | ND                        |
|                  | VH S44G           | HFR2   | 0.66                       | 6.0                       | ND                        |
|                  | VH T53I           | CDR-H2 | 0.72                       | 11                        | ND                        |
|                  | VH W59S           | CDR-H2 | 0.91                       | 7.6                       | ND                        |
|                  | VH E65P           | CDR-H2 | <b>0.40</b>                | <b>2.8</b>                | <b>0.10</b>               |
|                  | VH N74S           | HFR3   | 0.61                       | 7.2                       | ND                        |
|                  | VH M117Y          | CDR-H3 | <b>0.43</b>                | 4.5                       | ND                        |
|                  | VL T25A           | CDR-L1 | 1.7                        | 19                        | ND                        |
|                  | VL L29V           | CDR-L1 | 5.2                        | 71                        | ND                        |
|                  | VL T33L           | CDR-L1 | 3.6                        | 35                        | ND                        |
|                  | VL G55A           | CDR-L2 | 0.60                       | 5.7                       | ND                        |
|                  | VL R92D           | CDR-L3 | NB                         | 25                        | ND                        |
|                  | VL G95P           | LFR4   | 0.94                       | 5.1                       | ND                        |
| Round 2          | VH E65P-<br>M117Y | Multi  | <b>0.31</b>                | <b>2.5</b>                | <b>0.030</b>              |
| Error (mean CV): |                   |        | $\pm 12\%$                 | $\pm 14\%$                | $\pm 34\%$                |

### Supplementary Table 2: MEDI8852 variants.

Variants tested across two rounds of directed evolution, the corresponding Kabat-annotated regions, and  $K_d$  values for three HA antigens. The wildtype row is highlighted in gray; variants with improved affinity against the screened antigen (fold improvement  $> 1.1$ ) are highlighted in blue; values with one-sided  $t$ -test  $P < 0.05$  compared to wildtype are bolded. NB: no binding; ND: not determined; CV: coefficient of variation.

| <b>Antigen (Group)</b> | <b>Antibody</b> | <b>Fab <math>K_d</math> (nM)</b> |
|------------------------|-----------------|----------------------------------|
| H1 Caledonia (Group 1) | MEDI8852        | <0.001                           |
|                        | VH E65P         | <0.001                           |
|                        | VH E65P-M117Y   | <0.001                           |
| H1 Solomon (Group 1)   | MEDI8852        | <0.001                           |
|                        | VH E65P         | <0.001                           |
|                        | VH E65P-M117Y   | <0.001                           |
| H2 Japan (Group 1)     | MEDI8852        | <0.001                           |
|                        | VH E65P         | <0.001                           |
|                        | VH E65P-M117Y   | <0.001                           |
| H3 Panama (Group 2)    | MEDI8852        | <0.001                           |
|                        | VH E65P         | <0.001                           |
|                        | VH E65P-M117Y   | <0.001                           |
| H3 Victoria (Group 2)  | MEDI8852        | <0.001                           |
|                        | VH E65P         | <0.001                           |
|                        | VH E65P-M117Y   | <0.001                           |
| H4 Hubei (Group 2)     | MEDI8852        | 0.70                             |
|                        | VH E65P         | 0.40                             |
|                        | VH E65P-M117Y   | 0.31                             |
| H5 Vietnam (Group 1)   | MEDI8852        | <0.001                           |
|                        | VH E65P         | <0.001                           |
|                        | VH E65P-M117Y   | <0.001                           |
| H7 HK16 (Group 2)      | MEDI8852        | 6.2                              |
|                        | VH E65P         | 2.8                              |
|                        | VH E65P-M117Y   | 2.5                              |
| H7 HK17 (Group 2)      | MEDI8852        | 0.21                             |
|                        | VH E65P         | 0.10                             |
|                        | VH E65P-M117Y   | 0.030                            |

**Supplementary Table 3: Binding to Group 1 and Group 2 HAs.**

Binding affinity between MEDI8852 WT Fab and three variant Fabs against a panel of nine HAs. A  $K_d$  of  $<0.001$  indicates an interaction with no observed dissociation when measured via BLI.

| Round                       | Design                 | Region      | H1<br>Solomon<br>IgG $K_d$<br>app. (nM) | H1<br>Solomon<br>Fab $K_d$<br>(nM) | H4 Hubei<br>IgG $K_d$<br>app. (nM) | H4 Hubei<br>Fab $K_d$<br>( $\mu$ M) | H7 HK17<br>$K_d$ (nM)                                       |
|-----------------------------|------------------------|-------------|-----------------------------------------|------------------------------------|------------------------------------|-------------------------------------|-------------------------------------------------------------|
|                             | MEDI8852 UCA WT        |             | 2.0                                     | 140                                | 740                                | 29                                  | IgG app. $K_d$ :<br>17<br>Fab $K_d$ :<br>4400               |
| Round 1                     | VH S44G                | HFR2        | 2.1                                     | ND                                 | ND                                 | ND                                  | ND                                                          |
|                             | VH T53I                | CDR-H2      | 2.1                                     | ND                                 | ND                                 | ND                                  | ND                                                          |
|                             | VH K58S                | CDR-H2      | <b>1.5</b>                              | <b>110</b>                         | ND                                 | <b>2.5</b>                          | ND                                                          |
|                             | VH V65P                | CDR-H2      | <b>1.7</b>                              | ND                                 | ND                                 | ND                                  | ND                                                          |
|                             | VH N74S                | HFR3        | 2.6                                     | ND                                 | ND                                 | ND                                  | ND                                                          |
|                             | VH P75R                | HFR3        | 2.0                                     | ND                                 | ND                                 | ND                                  | ND                                                          |
|                             | VL N34A                | CDR-L1      | 8.2                                     | ND                                 | ND                                 | ND                                  | ND                                                          |
|                             | VL G95P                | LFR4        | <b>1.3</b>                              | <b>65</b>                          | ND                                 | <b>17</b>                           | ND                                                          |
| Round 2                     | VH K58S-V65P           | CDR-H2      | <b>1.3</b>                              | ND                                 | <b>80</b>                          | ND                                  | ND                                                          |
|                             | VH K58S-P75R           | Multi       | <b>1.2</b>                              | ND                                 | <b>47</b>                          | ND                                  | ND                                                          |
|                             | VH V65P-P75R           | Multi       | <b>1.5</b>                              | ND                                 | <b>570</b>                         | ND                                  | ND                                                          |
|                             | VH K58S-V65P-P75R      | Multi       | <b>1.2</b>                              | ND                                 | <b>72</b>                          | ND                                  | ND                                                          |
|                             | VH K58S / VL G95P      | Multi       | <b>0.96</b>                             | <b>56</b>                          | <b>36</b>                          | <b>3.1</b>                          | ND                                                          |
|                             | VH V65P / VL G95P      | Multi       | <b>0.93</b>                             | ND                                 | <b>100</b>                         | ND                                  | ND                                                          |
|                             | VH P75R / VL G95P      | Multi       | <b>0.95</b>                             | ND                                 | <b>110</b>                         | ND                                  | ND                                                          |
|                             | VH K58S-V65P / VL G95P | Multi       | <b>0.78</b>                             | <b>50</b>                          | <b>30</b>                          | <b>1.3</b>                          | IgG app. $K_d$ :<br><b>5.6</b><br>Fab $K_d$ :<br><b>810</b> |
|                             | VH K58S-P75R / VL G95P | Multi       | <b>0.88</b>                             | ND                                 | <b>45</b>                          | ND                                  | ND                                                          |
|                             | VH V65P-P75R / VL G95P | Multi       | <b>0.87</b>                             | ND                                 | <b>110</b>                         | ND                                  | ND                                                          |
| VH K58S-V65P-P75R / VL G95P | Multi                  | <b>0.79</b> | <b>55</b>                               | <b>42</b>                          | <b>1.5</b>                         | ND                                  |                                                             |
| Error (mean CV):            |                        |             | $\pm$ 11%                               | $\pm$ 8.6%                         | $\pm$ 10%                          | $\pm$ 16%                           | $\pm$ 13%                                                   |

#### Supplementary Table 4: MEDI8852 UCA variants.

Variants tested across two rounds of directed evolution, the corresponding Kabat-annotated regions, and  $K_d$  values for three HA antigens. In Round 2, all possible combinations involving K58S, V65P, P75R in the VH and G95P in the VL were made. The wildtype row is highlighted



in gray; variants with improved affinity against the screened antigen (fold improvement > 1.1) are highlighted in blue; values with one-sided  $t$ -test  $P < 0.05$  compared to wildtype are bolded .

$K_d$  app.:  $K_d$  apparent; ND: not determined; CV: coefficient of variation.

| Round            | Design                                 | Region | GP Fab $K_d$ (nM) | Ebola GP pseudotyped lentivirus $IC_{50}$ (nM) |
|------------------|----------------------------------------|--------|-------------------|------------------------------------------------|
|                  | mAb114 WT                              |        | 0.21              | 1.4                                            |
| Round 1          | VH M31S                                | CDR-H1 | 0.13              | ND                                             |
|                  | VH I41P                                | HFR2   | 0.33              | ND                                             |
|                  | VH D42G                                | HFR2   | 0.18              | ND                                             |
|                  | VH A68T                                | HFR3   | 0.10              | ND                                             |
|                  | VH E72D                                | HFR3   | 0.13              | ND                                             |
|                  | VH S79Y                                | HFR3   | 0.12              | ND                                             |
|                  | VH I113T                               | HFR4   | <b>0.071</b>      | ND                                             |
|                  | VL I19V                                | LFR1   | 0.23              | ND                                             |
|                  | VL F29I                                | CDR-L1 | 0.46              | ND                                             |
|                  | VL V43A                                | LFR2   | <b>0.068</b>      | ND                                             |
|                  | VL S49Y                                | LFR2   | 0.58              | ND                                             |
|                  | VL H70D                                | LFR3   | 0.27              | ND                                             |
|                  | VL N90Q                                | CDR-L3 | 4.0               | ND                                             |
| Round 2          | VH D42G-A68T-S79Y                      | Multi  | 0.19              | 1.2                                            |
|                  | VH I41P-D42G-A68T-S79Y-I113T           | Multi  | 0.19              | 1.2                                            |
|                  | VH A68T-I113T / VL V43A                | Multi  | 0.17              | 1.1                                            |
|                  | VH A68T-E72D-S79Y-I113T / VL V43A      | Multi  | <b>0.076</b>      | 1.2                                            |
|                  | VH D42G-A68T-S79Y / VL V43A            | Multi  | <b>0.061</b>      | <b>0.96</b>                                    |
|                  | VH I41P-D42G-A68T-S79Y-I113T / VL V43A | Multi  | <b>0.069</b>      | <b>1.0</b>                                     |
| Error (mean CV): |                                        |        | $\pm 41\%$        | $\pm 18\%$                                     |

### Supplementary Table 5: mAb114 variants.

Variants tested across two rounds of directed evolution, the corresponding Kabat-annotated regions, and  $K_d$  values for ebolavirus GP. Neutralization  $IC_{50}$  values were also determined for mAb114 WT and all Round-2 variant IgGs against GP-pseudotyped lentivirus. The wildtype row is highlighted in gray; variants with improved affinity against the screened antigen (fold

improvement > 1.1) are highlighted in blue; values with one-sided  $t$ -test  $P < 0.05$  compared to wildtype are bolded. ND: not determined; CV: coefficient of variation.

| Round            | Design                                     | Region | GP IgG $K_d$ app. ( $\mu$ M) | GP Fab $K_d$ ( $\mu$ M) |
|------------------|--------------------------------------------|--------|------------------------------|-------------------------|
|                  | mAb114 UCA WT                              |        | 7.9                          | 75                      |
| Round 1          | VH T41P                                    | HFR2   | 2.9                          | ND                      |
|                  | VH A54G                                    | CDR-H2 | NB                           | ND                      |
|                  | VH P60A                                    | CDR-H2 | NB*                          | ND                      |
|                  | VH G61D                                    | CDR-H2 | 2.8                          | ND                      |
|                  | VH E72D                                    | HFR3   | 3.6                          | ND                      |
|                  | VH G88E                                    | HFR3   | <b>3.0</b>                   | ND                      |
|                  | VH V96A                                    | HFR3   | 2.2                          | ND                      |
|                  | VL V43A                                    | LFR2   | <b>1.2</b>                   | ND                      |
|                  | VL K90Q                                    | CDR-L3 | 13                           | ND                      |
| Round 2          | VH P60A-G61D                               | CDR-H2 | <b>2.4</b>                   | ND                      |
|                  | VH T41P-P60A-G61D-E72D-G88E-V96A           | Multi  | <b>0.63</b>                  | ND                      |
|                  | VH G88E / VL V43A                          | Multi  | <b>0.26</b>                  | ND                      |
|                  | VH V96A / VL V43A                          | Multi  | <b>0.46</b>                  | ND                      |
|                  | VH P60A-G61D / VL V43A                     | Multi  | <b>0.097</b>                 | <b>0.48</b>             |
|                  | VH P60A-G61D-G88E-V96A / VL V43A           | Multi  | <b>0.27</b>                  | ND                      |
|                  | VH T41P-P60A-G61D-E72D-G88E-V96A / VL V43A | Multi  | <b>0.32</b>                  | ND                      |
| Error (mean CV): |                                            |        | $\pm$ 42%                    | $\pm$ 3.0%              |

### Supplementary Table 6: mAb114 UCA variants.

Variants tested across two rounds of directed evolution, the corresponding Kabat-annotated regions, and  $K_d$  values (for both IgG and Fab versions) for ebolavirus GP. The wildtype row is highlighted in gray; variants with improved affinity against the screened antigen (fold improvement  $> 1.1$ ) are highlighted in blue; values with one-sided  $t$ -test  $P < 0.05$  compared to wildtype are bolded. An asterisk (\*) indicates examples where some binding was observed but

BLI data were not suitable for fitting.  $K_d$  app.:  $K_d$  apparent; ND: not determined; CV: coefficient of variation.

| Round            | Design                                | Region | W1 S-6P Fab $K_d$ (nM) | Beta S-6P Fab $K_d$ (nM) | Omicron RBD Fab $K_d$ (nM) |
|------------------|---------------------------------------|--------|------------------------|--------------------------|----------------------------|
|                  | S309 WT                               |        | 2.5                    | 2.4                      | 14                         |
|                  | Sotrovimab (VH N55Q)                  | CDR-H2 | 2.4                    | 2.0                      | 17                         |
| Round 1          | VH P28T                               | HFR1   | 4.3                    | ND                       | ND                         |
|                  | VH T77N                               | HFR3   | 2.8                    | ND                       | ND                         |
|                  | VH G79A                               | HFR3   | 2.8                    | ND                       | ND                         |
|                  | VH R84S                               | HFR3   | 2.7                    | ND                       | ND                         |
|                  | VH R85S                               | HFR3   | 3.1                    | ND                       | ND                         |
|                  | VH R87T                               | HFR3   | 2.1                    | ND                       | ND                         |
|                  | VL T28S                               | CDR-L1 | <b>2.1</b>             | ND                       | ND                         |
|                  | VL T32N                               | CDR-L1 | 2.7                    | ND                       | ND                         |
|                  | VL S95V                               | CDR-L3 | NE                     | ND                       | ND                         |
|                  | VL L96P                               | CDR-L3 | 2.7                    | ND                       | ND                         |
| Round 2          | VH T77N-G79A-R84S                     | HFR3   | 3.2                    | ND                       | ND                         |
|                  | VH T77N-G79A-R84S-R85S                | HFR3   | 3.1                    | ND                       | ND                         |
|                  | VL T28S-T32N                          | CDR-L1 | 3.0                    | ND                       | ND                         |
|                  | VH G79A / VL T28S                     | Multi  | <b>2.0</b>             | <b>1.4</b>               | 15                         |
|                  | VH R84S / VL T28S                     | Multi  | 2.5                    | ND                       | ND                         |
|                  | VH R87T / VL T28S                     | Multi  | 2.5                    | ND                       | ND                         |
|                  | VH T77N-G79A-R84S / VL T28S           | Multi  | 3.3                    | ND                       | ND                         |
|                  | VH T77N-G79A-R84S / VL T28S-T32N      | Multi  | 3.5                    | ND                       | ND                         |
|                  | VH T77N-G79A-R84S-R85S / VL T28S-T32N | Multi  | 4.3                    | ND                       | ND                         |
| Error (mean CV): |                                       |        | ± 19%                  | ± 14%                    | ± 16%                      |

### Supplementary Table 7: S309 variants.

Variants tested across two rounds of directed evolution, the corresponding Kabat-annotated regions, and  $K_d$  values for antigens from three SARS-CoV-2 variants. The wildtype row is highlighted in gray; variants with improved affinity against the screened antigen (fold

improvement  $> 1.1$ ) are highlighted in blue; values with one-sided  $t$ -test  $P < 0.05$  compared to wildtype are bolded . W1: Wuhan-Hu-1; NE: no expression; ND: not determined; CV: coefficient of variation.

| Round            | Design                            | Region | Beta S-6P IgG $K_d$ app. (nM) | Beta S-6P Fab $K_d$ (nM) | Omicron RBD IgG $K_d$ app. ( $\mu$ M) | D614G-pseudotyped lentivirus IC <sub>50</sub> (ng/mL) | Beta-pseudotyped lentivirus IC <sub>50</sub> (ng/mL) |
|------------------|-----------------------------------|--------|-------------------------------|--------------------------|---------------------------------------|-------------------------------------------------------|------------------------------------------------------|
|                  | REGN10987 WT                      |        | 0.091                         | 14                       | 0.70 (Fab $K_d$ : 23)                 | 1.1                                                   | 1.4                                                  |
| Round 1          | VH R16G                           | HFR1   | 0.073                         | <b>11</b>                | 0.51                                  | 0.83                                                  | <b>0.73</b>                                          |
|                  | VH S98R                           | HFR3   | 0.41                          | ND                       | ND                                    | ND                                                    | ND                                                   |
|                  | VH V108D                          | CDR-H3 | 0.076                         | 26                       | ND                                    | ND                                                    | ND                                                   |
|                  | VL S82A                           | LFR3   | 0.063                         | 17                       | ND                                    | ND                                                    | ND                                                   |
|                  | VL N91C                           | CDR-L3 | 0.053                         | 12                       | ND                                    | ND                                                    | ND                                                   |
|                  | VL N91S                           | CDR-L3 | 0.066                         | 27                       | ND                                    | ND                                                    | ND                                                   |
|                  | VL L93Y                           | CDR-L3 | 0.30                          | ND                       | ND                                    | ND                                                    | ND                                                   |
|                  | VL I96S                           | CDR-L3 | 0.072                         | 15                       | ND                                    | ND                                                    | ND                                                   |
| Round 2          | VH R16G-V108D                     | Multi  | ND                            | 25                       | 2.2                                   | ND                                                    | ND                                                   |
|                  | VL S82A-N91C-I96S                 | Multi  | ND                            | <b>12</b>                | 0.48                                  | 1.0                                                   | <b>0.87</b>                                          |
|                  | VH R16G / VL S82A                 | Multi  | ND                            | <b>12</b>                | 0.88                                  | 1.0                                                   | <b>0.78</b>                                          |
|                  | VH R16G / VL N91C                 | Multi  | ND                            | 23                       | 0.42 (Fab $K_d$ : <b>4.5</b> )        | ND                                                    | ND                                                   |
|                  | VH R16G / VL I96S                 | Multi  | ND                            | 13                       | 1.2                                   | 1.2                                                   | <b>0.79</b>                                          |
|                  | VH R16G-V108D / VL S82A-N91C-I96S | Multi  | ND                            | 36                       | 2.5                                   | ND                                                    | ND                                                   |
| Error (mean CV): |                                   |        | NA                            | ± 32%                    | ± 19%                                 | ± 30%                                                 | ± 15%                                                |

### Supplementary Table 8: REGN10987 variants.

Variants tested across two rounds of directed evolution, the corresponding Kabat-annotated regions, and  $K_d$  values for antigens from two SARS-CoV-2 variants. Round-1 variants were pre-screened as IgGs with a single replicate before testing the highest-avidity variants as Fabs and with multiple replicates. Neutralization IC<sub>50</sub> values were also determined for REGN10987 WT and selected affinity-enhancing variant IgGs against D614G- and Beta-pseudotyped lentivirus. The wildtype row is highlighted in gray; variants with improved affinity against the screened antigen (fold improvement > 1.1) are highlighted in blue; values with one-sided  $t$ -test  $P < 0.05$



compared to wildtype are bolded.  $K_d$  app.:  $K_d$  apparent; NA: not applicable; ND: not determined;  
CV: coefficient of variation.

| Round            | Design                                             | Region | Beta S-6P<br>IgG $K_d$<br>app. (nM) | W1 S-6P<br>IgG $K_d$<br>app. (nM) | Omicron<br>IgG $K_d$<br>app. ( $\mu$ M) | D614G<br>pseudotyped<br>lentivirus<br>IC <sub>50</sub> (ng/mL) | Beta<br>pseudotyped<br>lentivirus IC <sub>50</sub><br>(ng/mL) |
|------------------|----------------------------------------------------|--------|-------------------------------------|-----------------------------------|-----------------------------------------|----------------------------------------------------------------|---------------------------------------------------------------|
|                  | C143 WT                                            |        | 450                                 | 39                                | 610                                     | 1400                                                           | 5800                                                          |
| Round 1          | VH V29F                                            | HFR1   | <b>140</b>                          | ND                                | ND                                      | ND                                                             | ND                                                            |
|                  | VH K32Y                                            | CDR-H1 | 32000                               | ND                                | ND                                      | ND                                                             | ND                                                            |
|                  | VH L51Y                                            | CDR-H2 | 180                                 | ND                                | ND                                      | ND                                                             | ND                                                            |
|                  | VH D57T                                            | CDR-H2 | NB*                                 | ND                                | ND                                      | ND                                                             | ND                                                            |
|                  | VH A77T                                            | HFR3   | 170                                 | ND                                | ND                                      | ND                                                             | ND                                                            |
|                  | VH G91A                                            | HFR3   | 170                                 | ND                                | ND                                      | ND                                                             | ND                                                            |
|                  | VL N27S                                            | CDR-L1 | 130                                 | ND                                | ND                                      | ND                                                             | ND                                                            |
|                  | VL T33N                                            | CDR-L1 | <b>37</b>                           | ND                                | ND                                      | <b>200</b>                                                     | <b>870</b>                                                    |
|                  | VL L34Y                                            | CDR-L1 | 200                                 | ND                                | ND                                      | ND                                                             | ND                                                            |
|                  | VL Y41H                                            | LFR2   | <b>110</b>                          | ND                                | ND                                      | ND                                                             | ND                                                            |
|                  | VL G53V                                            | CDR-L2 | <b>29</b>                           | ND                                | ND                                      | <b>110</b>                                                     | <b>180</b>                                                    |
|                  | VL S57P                                            | CDR-L2 | NB*                                 | ND                                | ND                                      | ND                                                             | ND                                                            |
|                  | VL G82A                                            | LFR3   | NB*                                 | ND                                | ND                                      | ND                                                             | ND                                                            |
|                  | VL A96S                                            | CDR-L3 | 250                                 | ND                                | ND                                      | ND                                                             | ND                                                            |
| Round 2          | VH L51Y-A77T-<br>G91A                              | Multi  | NB*                                 | ND                                | ND                                      | ND                                                             | ND                                                            |
|                  | VL T33N-G53V                                       | Multi  | <b>34</b>                           | 30                                | <b>160</b>                              | <b>74</b>                                                      | <b>290</b>                                                    |
|                  | VL N27S-T33N-<br>L34Y-G53V                         | Multi  | 520                                 | ND                                | ND                                      | ND                                                             | ND                                                            |
|                  | VL N27S-T33N-<br>L34Y-Y41H-G53V-<br>S57P-G82A      | Multi  | 800                                 | ND                                | ND                                      | ND                                                             | ND                                                            |
|                  | VH L51Y-A77T-<br>G91A / VL T33N                    | Multi  | NB*                                 | ND                                | ND                                      | ND                                                             | ND                                                            |
|                  | VH L51Y-A77T-<br>G91A / VL N27S-<br>T33N-L34Y-G53V | Multi  | 320                                 | ND                                | ND                                      | ND                                                             | ND                                                            |
| Error (mean CV): |                                                    |        | $\pm$ 48%                           | $\pm$ 26%                         | $\pm$ 24%                               | $\pm$ 21%                                                      | $\pm$ 36%                                                     |

### Supplementary Table 9: C143 variants.

Variants tested across two rounds of directed evolution, the corresponding Kabat-annotated regions, and  $K_d$  values for antigens from three SARS-CoV-2 variants. Neutralization IC<sub>50</sub> values were also determined for C143 WT and selected affinity-enhancing variant IgGs against D614G-

and Beta-pseudotyped lentivirus. The wildtype row is highlighted in gray; variants with improved affinity against the screened antigen (fold improvement > 1.1) are highlighted in blue; values with one-sided  $t$ -test  $P < 0.05$  compared to wildtype are bolded. An asterisk (\*) indicates examples where some binding was observed but BLI data were not suitable for fitting. W1: Wuhan-Hu-1;  $K_d$  app.:  $K_d$  apparent; NB: no binding; ND: not determined; CV: coefficient of variation.

| Antibody     | Affinity-enhancing substitution | UniRef90 (training dataset) |                          |             |                       |                                            | abYsis                     |                          |             |                       |
|--------------|---------------------------------|-----------------------------|--------------------------|-------------|-----------------------|--------------------------------------------|----------------------------|--------------------------|-------------|-----------------------|
|              |                                 | Wildtype residue frequency  | Mutant residue frequency | Top residue | Top residue frequency | Notes                                      | Wildtype residue frequency | Mutant residue frequency | Top residue | Top residue frequency |
| MEDI8852     | VH E65P                         | 6%                          | 32%                      | D           | 35%                   |                                            | 14%                        | 22%                      | D           | 32%                   |
|              | VH M117Y                        | <1%                         | 59%                      | -           | -                     |                                            | <1%                        | 49%                      | -           | -                     |
| MEDI8852 UCA | VH K58S                         | 8%                          | 3%                       | T           | 67%                   | Uncommon to rare, site-independent rank 8  | 2%                         | 30%                      | G           | 35%                   |
|              | VH V65P                         | 1%                          | 32%                      | D           | 36%                   |                                            | 2%                         | 22%                      | D           | 32%                   |
|              | VL G95P                         | 44%                         | 2%                       | G           | 44%                   | Common to rare, site-independent rank 2728 | 99%                        | <1%                      | G           | 99%                   |
| mAb114       | VH M31S                         | <1%                         | 45%                      | -           | -                     |                                            | <1%                        | 48%                      | -           | -                     |
|              | VH D42G                         | 1%                          | 88%                      | -           | -                     |                                            | <1%                        | 91%                      | -           | -                     |
|              | VH A68T                         | 1%                          | 88%                      | -           | -                     |                                            | 1%                         | 85%                      | -           | -                     |
|              | VH E72D                         | 4%                          | 91%                      | -           | -                     |                                            | 2%                         | 93%                      | -           | -                     |
|              | VH S79Y                         | 8%                          | 74%                      | -           | -                     |                                            | 16%                        | 67%                      | -           | -                     |
|              | VH I113T                        | 2%                          | 69%                      | -           | -                     |                                            | 2%                         | 89%                      | -           | -                     |
|              | VL V43A                         | 4%                          | 50%                      | -           | -                     |                                            | 2%                         | 57%                      | -           | -                     |
| mAb114 UCA   | VH T41P                         | 1%                          | 94%                      | -           | -                     |                                            | 1%                         | 92%                      | -           | -                     |
|              | VH G61D                         | 2%                          | 57%                      | -           | -                     |                                            | 1%                         | 32%                      | -           | -                     |
|              | VH E72D                         | 4%                          | 92%                      | -           | -                     |                                            | 2%                         | 93%                      | -           | -                     |
|              | VH G88E                         | 1%                          | 85%                      | -           | -                     |                                            | 2%                         | 67%                      | -           | -                     |
|              | VH V96A                         | 6%                          | 77%                      | -           | -                     |                                            | 5%                         | 85%                      | -           | -                     |
|              | VL V43A                         | 4%                          | 50%                      | -           | -                     |                                            | 2%                         | 57%                      | -           | -                     |
| S309         | VH R87T                         | 37%                         | 30%                      | R           | 37%                   |                                            | 39%                        | 41%                      | -           | -                     |
|              | VL T28S                         | 1%                          | 54%                      | -           | -                     |                                            | 2%                         | 77%                      | -           | -                     |
| REGN10987    | VH R16G                         | 5%                          | 68%                      | -           | -                     |                                            | 6%                         | 31%                      | -           | -                     |
|              | VL N91C                         | 2%                          | 2%                       | Q           | 39%                   | Rare to rare, site-independent rank 85     | 1%                         | 4%                       | Q           | 52%                   |
| C143         | VH V29F                         | 3%                          | 78%                      | -           | -                     |                                            | 4%                         | 69%                      | -           | -                     |
|              | VH L51Y                         | 4%                          | 18%                      | -           | -                     |                                            | 1%                         | <1%                      | I           | 85%                   |

|         |     |     |   |     |                                             |     |     |   |     |
|---------|-----|-----|---|-----|---------------------------------------------|-----|-----|---|-----|
| VH A77T | 1%  | 56% | - | -   |                                             | <1% | 62% | - | -   |
| VH G91A | 4%  | 95% | - | -   |                                             | 2%  | 97% | - | -   |
| VL N27S | 11% | 53% | - | -   |                                             | 3%  | 77% | - | -   |
| VL T33N | 2%  | 44% | - | -   |                                             | 12% | 36% | - | -   |
| VL L34Y | 4%  | 34% | - | -   |                                             | 2%  | 59% | - | -   |
| VL Y41H | <1% | 6%  | K | 59% | Rare to uncommon, site-independent rank 66  | <1% | 5%  | K | 67% |
| VL G53V | 2%  | 10% | A | 30% | Rare to uncommon, site-independent rank 247 | 4%  | 12% | A | 40% |
| VL A96S | 2%  | 57% | - | -   |                                             | 2%  | 36% | - | -   |

**Supplementary Table 10: Originality of affinity-enhancing substitutions.**

Each row corresponds to an amino acid substitution that enhances the binding affinity of its corresponding variant antibody, and some of which also enhance affinity in combination with other substitutions. We computed frequencies of amino acid substitutions among natural sequences using two datasets, UniRef90 and abYsis (**Methods**); UniRef90 was the sequence database used to train the language models in our algorithm and abYsis is a separate, curated database of natural antibody sequences. The “wildtype residue frequency” indicates the percentage of sequences in a multiple sequence alignment with the same residue as wildtype at the given position; the “mutant residue frequency” is the same statistic except for the mutant residue. The “top residue” indicates the amino acid with the highest frequency observed at the given site, the “top residue frequency” indicates the percentage of sequences that contain the top residue at the given site, and dashes indicate settings in which the mutant residue is also the top residue. Substitutions with frequencies up to 5% are considered “rare,” those with frequencies above 5% and up to 10% are considered “uncommon,” and those above 10% are considered

“common.” Blue shading indicates substitutions to rare or uncommon residues according to frequency information from either UniRef90 or abYsis. The “site-independent rank” indicates the rank of the corresponding rare or uncommon substitution when ordering all possible single-residue substitutions according to the likelihood ratio to wildtype under a UniRef90-based site-independent model (**Supplementary Table 12**), where a rank of 1 indicates the highest likelihood ratio.

| Antibody     | Affinity-enhancing substitution | IMGT germline statistics |                              |                            |                          |             |                       |                    |
|--------------|---------------------------------|--------------------------|------------------------------|----------------------------|--------------------------|-------------|-----------------------|--------------------|
|              |                                 | Gene                     | Number of database sequences | Wildtype residue frequency | Mutant residue frequency | Top residue | Top residue frequency | Notes              |
| MEDI8852     | VH E65P                         | IGHV6-1                  | 297                          | 4%                         | 3%                       | V           | 77%                   | Rare to rare       |
|              | VH M117Y                        | IGHJ3                    | 4546                         | 2%                         | 51%                      | -           | -                     |                    |
| MEDI8852 UCA | VH K58S                         | IGHV6-1                  | 297                          | 83%                        | <1%                      | K           | 83%                   | Common to rare     |
|              | VH V65P                         | IGHV6-1                  | 297                          | 74%                        | 3%                       | V           | 74%                   | Common to rare     |
|              | VL G95P                         | IGKJ1                    | 2019                         | 94%                        | <1%                      | G           | 94%                   | Common to rare     |
| mAb114       | VH M31S                         | IGHV3-13                 | 75                           | 1%                         | 60%                      | -           | -                     |                    |
|              | VH D42G                         | IGHV3-13                 | 75                           | 1%                         | 86%                      | -           | -                     |                    |
|              | VH A68T                         | IGHV3-13                 | 75                           | 1%                         | 86%                      | -           | -                     |                    |
|              | VH E72D                         | IGHV3-13                 | 75                           | 69%                        | 22%                      | E           | 69%                   |                    |
|              | VH S79Y                         | IGHV3-13                 | 75                           | 5%                         | 83%                      | -           | -                     |                    |
|              | VH I113T                        | IGHJ4                    | 8345                         | 2%                         | 82%                      | -           | -                     |                    |
|              | VL V43A                         | IGKV1-27                 | 83                           | 86%                        | 7%                       | V           | 86%                   | Common to uncommon |
| mAb114 UCA   | VH T41P                         | IGHV3-13                 | 75                           | 60%                        | 17%                      | T           | 60%                   |                    |
|              | VH G61D                         | IGHV3-13                 | 75                           | 55%                        | 31%                      | G           | 55%                   |                    |
|              | VH E72D                         | IGHV3-13                 | 75                           | 69%                        | 22%                      | E           | 69%                   |                    |
|              | VH G88E                         | IGHV3-13                 | 75                           | 66%                        | 22%                      | G           | 66%                   |                    |
|              | VH V96A                         | IGHV3-13                 | 75                           | 16%                        | 63%                      | -           | -                     |                    |
|              | VL V43A                         | IGKV1-27                 | 83                           | 86%                        | 7%                       | V           | 86%                   | Common to uncommon |
| S309         | VH R87T                         | IGHV1-18                 | 597                          | 62%                        | 16%                      | R           | 62%                   |                    |
|              | VL T28S                         | IGKV3-20                 | 909                          | 3%                         | 86%                      | -           | -                     |                    |
| REGN10987    | VH R16G                         | IGHV3-30                 | 330                          | 64%                        | 19%                      | R           | 64%                   |                    |
|              | VL N91C                         | IGLV2-14                 | 301                          | 4%                         | 2%                       | S           | 81%                   | Rare to rare       |
| C143         | VH V29F                         | IGHV3-66                 | 44                           | 75%                        | 5%                       | V           | 75%                   | Common to rare     |
|              | VH L51Y                         | IGHV3-66                 | 44                           | 7%                         | <1%                      | I           | 84%                   | Uncommon to rare   |
|              | VH A77T                         | IGHV3-66                 | 44                           | 2%                         | 87%                      | -           | -                     |                    |
|              | VH G91A                         | IGHV3-66                 | 44                           | 5%                         | 82%                      | -           | -                     |                    |

|         |          |     |     |     |   |     |                    |
|---------|----------|-----|-----|-----|---|-----|--------------------|
| VL N27S | IGLV2-23 | 116 | 3%  | 91% | - | -   |                    |
| VL T33N | IGLV2-23 | 116 | <1% | 91% | - | -   |                    |
| VL L34Y | IGLV2-23 | 116 | 75% | 6%  | L | 75% | Common to uncommon |
| VL Y41H | IGLV2-23 | 116 | 7%  | 91% | - | -   |                    |
| VL G53V | IGLV2-23 | 116 | 37% | 57% | - | -   |                    |
| VL A96S | IGLV2-23 | 116 | 2%  | 77% | - | -   |                    |

**Supplementary Table 11: Germline frequencies of affinity-enhancing substitutions.**

Each row corresponds to an amino acid substitution that enhances the binding affinity of its corresponding variant antibody, and some of which also enhance affinity in combination with other substitutions. We computed frequencies of amino acid substitutions based on IMGT germline sequences, where for each substitution, we restrict the multiple sequence alignment to only include sequences from its corresponding V or J gene, which are listed in the “gene” column (**Methods**). The “number of database sequences” indicates the number of germline sequences found for that gene in IMGT (the denominator of frequency values). The “wildtype residue frequency” indicates the percentage of sequences in a multiple sequence alignment with the same residue as wildtype at the given position; the “mutant residue frequency” is the same statistic except for the mutant residue. The “top residue” indicates the amino acid with the highest frequency observed at the given site, the “top residue frequency” indicates the percentage of sequences that contain the top residue at the given site, and dashes indicate settings in which the mutant residue is also the top residue. Substitutions with frequencies up to 5% are considered “rare,” those with frequencies above 5% and up to 10% are considered “uncommon,” and those above 10% are considered “common.” Blue shading indicates substitutions to rare or uncommon residues according to frequency information from IMGT germline sequences.



| Antibody   | Metric                         | Method     |           |           |           |           |
|------------|--------------------------------|------------|-----------|-----------|-----------|-----------|
|            |                                | This study | abYsis    | UniRef90  | AbLang    | Sapiens   |
| MEDI UCA   | Fraction with improved binding | 3/8 = 38%  | 0/8 = 0%  | 2/8 = 25% | 0/8 = 0%  | 1/8 = 13% |
|            | Median fold improvement        | 1.2        | 1.0       | 1.1       | 0.45      | 0.95      |
|            | Maximum fold improvement       | 1.7        | 1.2       | 1.5       | 1.1       | 1.5       |
| mAb114 UCA | Fraction with improved binding | 6/9 = 67%  | 5/9 = 56% | 5/9 = 56% | 1/9 = 11% | 1/9 = 11% |
|            | Median fold improvement        | 2.2        | 1.9       | 1.9       | 0.78      | 0.98      |
|            | Maximum fold improvement       | 6.0        | 6.0       | 4.8       | 3.1       | 3.1       |
| C143       | Fraction with improved binding | 3/14 = 21% | 0/14 = 0% | 0/14 = 0% | 1/14 = 7% | 1/14 = 7% |
|            | Median fold improvement        | 1.3        | 0.86      | 0.22      | 0.79      | 0.81      |
|            | Maximum fold improvement       | 12         | 1.7       | 1.3       | 8.1       | 8.1       |

**Supplementary Table 12: Benchmarking results comparing sequence-based methods for proposing substitutions.**

We compared the changes in avidity of substitutions recommended by four sequence-based baseline methods (abYsis, UniRef90, AbLang, and Sapiens) to those of the substitutions used in the first round of our evolutionary campaigns (this study). Summary statistics are: (1) the fraction with improved binding, defined as a change in IgG apparent  $K_d$  with nominal one-sided  $t$ -test  $P < 0.05$ ; (2) the median fold improvement across all substitutions; and (3) the maximum fold improvement across all substitutions. The best values in each category are shaded light blue. The full set of benchmark results is provided in **Supplementary Data 3**.

| Protein            | Reference                    | Organism | Fitness setting                                | Cutoff                      | Sample successes | Sample size | Population successes | Population size | Hit rate (%) | Background (%) | Hypergeo. <i>P</i> |
|--------------------|------------------------------|----------|------------------------------------------------|-----------------------------|------------------|-------------|----------------------|-----------------|--------------|----------------|--------------------|
| ADRB2              | Jones et al., 2019 [72]      | Human    | Signal transduction + pathway reporter         | > 2.8                       | 2                | 9           | 914                  | 7800            | 22%          | 12%            | 0.28               |
| $\beta$ -lactamase | Stiffler et al., 2015 [73]   | Bacteria | Antibiotic resistance (ampicillin, 2500 ug/mL) | > 0.01                      | 4                | 10          | 393                  | 4978            | 40%          | 7.9%           | 0.0055             |
| Env                | Haddox et al., 2016 [74]     | Virus    | Viral replication fitness                      | > 0.1                       | 7                | 31          | 748                  | 12863           | 23%          | 5.8%           | 0.0017             |
| HA H1              | Doud and Bloom, 2016 [75]    | Virus    | Viral replication fitness                      | > 0.1                       | 5                | 32          | 645                  | 10716           | 16%          | 6.0%           | 0.041              |
| HA H3              | Lee et al., 2018 [76]        | Virus    | Viral replication fitness                      | > 0.1                       | 5                | 16          | 714                  | 10754           | 31%          | 6.6%           | 0.0030             |
| infA               | Kelsic et al., 2016 [77]     | Bacteria | Competitive growth                             | > 0.98                      | 5                | 10          | 305                  | 1368            | 50%          | 22%            | 0.050              |
| MAPK1              | Brenan et al., 2016 [78]     | Human    | Competitive growth (SCH772984)                 | > 2.5                       | 1                | 13          | 77                   | 6810            | 7.7%         | 1.1%           | 0.14               |
| P53                | Giacomelli et al., 2018 [79] | Human    | Competitive growth (etoposide)                 | > 1                         | 2                | 17          | 905                  | 7448            | 12%          | 12%            | 0.63               |
| PafA               | Markin et al., 2021 [8]      | Bacteria | $K_{cat}/K_M$                                  | $P < 0.01$ , faster than WT | 2                | 10          | 35                   | 1040            | 20%          | 3.4%           | 0.042              |

**Supplementary Table 13: Enrichment of high-fitness variants based on language-model-recommended substitutions.**

Each row corresponds to a protein tested via a high-throughput scanning mutagenesis assay that measures various notions of protein fitness, which are summarized in the “Fitness setting” column. All assays involve deep mutational scans that profile variants that

represent 90% or more coverage of all single-residue substitutions except for that of PafA, which changes every residue to either a glycine or a valine. The cutoff indicates the study-specific criterion for determining a high-fitness variant. The “Sample size” indicates the number of acquired variants ( $|\mathcal{A}|$ ) and “Sample successes” indicates the number of those variants with high fitness according to the cutoff. The “Population size” indicates the number of variants profiled in the scanning mutagenesis assay, where “Population successes” indicates the number of those variants with high fitness according to the cutoff. “Hit rate” indicates the percentage fraction of high-fitness variants among the language-model-recommended variants (sample successes divided by sample size) whereas “Background” indicates the percentage fraction of high-fitness variants among all single-residue variants (population successes divided by population size). The hypergeometric  $P$  value computes enrichment of high-fitness variants among the acquired variants by assuming that the number of sample successes has a hypergeometric null distribution with parameters given by the other values (sample size, population successes, and population size); blue shading indicates a one-sided, hypergeometric  $P$ -value of less than 0.05.

## Supplementary Information

### *Antibody sequences*

Below are the antibody protein sequences defined as wildtype in this study:

- MEDI8852 VH:

QVQLQQSGPGLVKPSQTLSTCAISGDSVSSYNAVWNWIRQSPSRGLEWLGRTY  
YRSGWYNDYAESVKSRLTINPDTSKNQFSLQLNSVTPEDTAVYYCARSGHITVFG  
VNVDAFDMWGQGMVTVSS

- MEDI8852 VL:

DIQMTQSPSSLSASVGDRVTITCRTSQSLSSYTHWYQQKPGKAPKLLIYAASSRGS  
GVPSRFSGSGSGTDFTLTISSLQPEDFATYYCQQSRFTFGQGTKVEIK

- MEDI8852 UCA VH:

QVQLQQSGPGLVKPSQTLSTCAISGDSVSSNSAAWNWIRQSPSRGLEWLGRTY  
YRSKWYNDYAVSVKSRLTINPDTSKNQFSLQLNSVTPEDTAVYYCARGGHITIFG  
VNIDAFDIWGQGMVTVSS

- MEDI8852 UCA VL:

DIQMTQSPSSLSASVGDRVTITCRASQSISSYLNWYQQKPGKAPKLLIYAASSLQS  
GVPSRFSGSGSGTDFTLTISSLQPEDFATYYCQQSRFTFGQGTKVEIK

- mAb114 VH:

EVQLVESGGGLIQPGSLRLSCAASGFALRMYDMHWVRQTIDKRLEWVSAVGP  
SGDTYYADSVKGRFAVSRENAKNSLSLQMNSLTAGDTAIYYCVRSDRGVAGLF  
DSWGQGILVTVSS

- mAb114 VL:

DIQMTQSPSSLSASVGDRITITCRASQAFDNYVAWYQQRPGKVPKLLISAASALH  
AGVPSRFSGSGSGTHFTLTISLQPEDVATYYCQNYNSAPLTFGGGTKVEIK

- mAb114 UCA VH:

EVQLVESGGGLVQPGGSLRLSCAASGFTFSSYDMHWVRQATGKGLEWVSAIGT  
AGDTYYPGSVKGRFTISRENAKNSLYLQMNSLRAGDTAVYYCVRSDRGVAGLF  
DSWGQGTLVTVSS

- mAb114 UCA VL:

DIQMTQSPSSLSASVGDRVTITCRASQGISNYLAWYQQKPGKVPKLLIYAASSTLQ  
SGVPSRFSGSGSGTDFTLTISLQPEDVATYYCQKYNSAPLTFGGGTKVEIK

- S309 VH:

QVQLVQSGAEVKKPGASVKVSKASGYPFTSYGISWVRQAPGGLEWMGWIST  
YNGNTNYAQKFQGRVTMTTDTSTTTGYMELRRLRSDDTAVYYCARDYTRGAW  
FGESLIGGFDNWGQGTLVTVSS

- S309 VL:

EIVLTQSPGTLSLSPGERATLSCRASQTVSSSTSLAWYQQKPGQAPRLLIYGASSRA  
TGIPDRFSGSGSGTDFTLTISRLEPEDFAVYYCQQHDTSLTFGGGTKVEIK

- REGN10987 VH:

QVQLVESGGGVVQPGRSLRLSCAASGFTFSNYAMYWVRQAPGKGLEWVAVISY  
DGSNKYYADSVKGRFTISRDNKNTLYLQMNSLRTEDTAVYYCASGSDYGDYL  
LVYWGQGTLVTVSS

- REGN10987 VL:

QSALTQPASVSGSPGQSITISCTGTSSDVGGYNYVSWYQQHPGKAPKLMYDVSK

RPSGVSNRFSGSKSGNTASLTISGLQSEDEADYYCNSLTSISTWVFGGGTKLTVL

- C143 VH:

EVQLVESGGGLVQPGGSLRLSCAASGFSVSTKYMTWVRQAPGKGLEWVSVLYS

GGSDYYADSVKGRFTISRDN SKNALY LQMNSLRVEDTGVYYCARDSSEVRDHP

GHPGRSVGAFDIWGQGMVTVSS

- C143 VL:

QSALTQPASVSGSPGQSITISCTGT SNDVGSYTLVSWYQQYPGKAPKLLIFEGTKR

SSGISNRFSGSKSGNTASLTISGLQGEDEADYYCCSYAGASTFVFGGGTKLTVL
